# Supplementary material for: Development and Evaluation of Integrated Chrono-Nutrition Weight Reduction Program among Overweight/Obese with Morning and Evening Chronotypes
Source: MDPI journal article supplement (doi:10.3390/ijerph19084469), 2022-04-07
Supplement: s1 [file s1]

**Table S1:** Pre-post intervention differences in total dietary intake, meal timing, NES score, sleep habits and physical activity (Complete case, n=85)

|                          | MT (n=44)       |                 | ET (n=41)       |                 | Mean difference (95% CI)   |                         |                         |
|--------------------------|-----------------|-----------------|-----------------|-----------------|----------------------------|-------------------------|-------------------------|
|                          | Pre             | Post            | Pre             | Post            | Time                       | CT                      | Time x CT               |
| Total dietary intake     |                 |                 |                 |                 |                            |                         |                         |
| EI (kcal/day)            | 1684 ± 443      | 1227 ± 331      | 1889 ± 477      | 1334 ± 394      | -506 (-594, -417)***       | -156 (-311, -0.8)*      | -98 (-275, 80)          |
| CHO (g/day)              | 207.0 ± 64.3    | 152.7 ± 46.0    | 224.9 ± 66.2    | 160.5 ± 48.6    | -59.3 (-72.0, -46.6)***    | -12.8 (-33.9, 8.2)      | 9.8 (-15.6, 35.3)       |
| % E CHO                  | 49.1 ± 5.7      | 49.7 ± 6.2      | 47.6 ± 5.7      | 48.6 ± 6.1      | 0.8 (-0.8, 2.3)            | 1.4 (-0.7, 3.4)         | -0.5 (-3.5, 2.6)        |
| Protein (g/day)          | 64.6 ± 16.6     | 57.6 ± 10.5     | 71.8 ± 17.6     | 60.1 ± 17.4     | -9.3 (-12.8, -5.7)***      | -4.8 (-10.6, 1.0)       | 4.7 (-11.8, 2.4)        |
| % E protein              | 15.6 ± 3.0      | 19.5 ± 3.8      | 15.3 ± 1.7      | 18.4 ± 4.1      | 3.5 (2.5, 4.5)***          | 0.7 (-0.4, 1.7)         | 0.8 (-1.2, 2.8)         |
| Fat (g/day)              | 66.0 ± 19.2     | 42.9 ± 16.9     | 78.0 ± 22.9     | 50.2 ± 20.5     | -25.4 (-30.1, -20.7)***    | -9.7 (-16.9, -2.4)**    | 4.8 (-4.6, 14.2)        |
| % E fat                  | 35.1 ± 5.0      | 30.8 ± 6.3      | 37.1 ± 5.1      | 33.0 ± 6.6      | -4.2 (-5.7, -2.6)***       | -2.1 (-4.1, -0.2)*      | -0.2 (-3.2, 2.9)        |
| Meal timing              |                 |                 |                 |                 |                            |                         |                         |
| First meal (hh:mm)       | 08:12 ± 0:41    | 08:03 ± 0:47    | 08:27 ± 0:41    | 08:25 ± 0:40    | -0.1 (-0.2, 0.0)           | -0.3 (-0.6, -0.0)*      | -0.1 (-0.4, 0.1)        |
| Last meal (hh:mm)        | 19:56 ± 1:15    | 19:36 ± 1:08    | 20:23 ± 1:41    | 20:07 ± 1:30    | -0.3 (-0.6, 2.3)           | -0.5 (-1.0, 0.0)        | -0.1 (-0.8, 0.6)        |
| Total eating window (h)  | 11.7 ± 1.6      | 11.6 ± 1.3      | 11.9 ± 1.7      | 11.7 ± 1.5      | -0.2 (-0.6, 0.2)           | -0.2 (-0.7, 0.4)        | 0.0 (-0.7, 0.8)         |
| Midpoint eating (hh:mm)  | 14:04 ± 0:38    | 13:50 ± 0:42    | 14:25 ± 0:59    | 14:16 ± 0:53    | -0.2 (-0.4, -0.0)*         | -0.4 (-0.7, -0.1)*      | -0.1 (-0.4, 0.3)        |
| Elapse SOn-last meal (h) | 3.0 ± 1.5       | 3.5 ± 1.3       | 3.5 ± 1.8       | 3.2 ± 1.5       | 0.1 (-0.3, 0.5)            | -0.1 (-0.7, 0.4)        | 0.8 (0.1, 1.6)*         |
| NES score                | 10.5 ± 4.9      | 9.3 ± 4.1       | 10.9 ± 5.4      | 8.9 ± 5.0       | -1.6 (-2.7, -0.6)**        | -0.0 (-1.8, 1.8)        | 0.8 (-1.3, 3.0)         |
| Sleep                    |                 |                 |                 |                 |                            |                         |                         |
| Work SD (hour)           | 6.6 ± 1.0       | 6.7 ± 0.9       | 6.1 ± 0.9       | 7.4 ± 1.2       | 0.7 (0.4, 1.0)***          | -0.1 (-0.4, 0.2)        | -1.1 (-1.7, -0.6)***    |
| Free SD (hour)           | 7.3 ± 1.2       | 6.5 ± 0.9       | 6.7 ± 1.5       | 6.7 ± 0.8       | -0.4 (-0.7, -0.1)*         | 0.2 (-0.2, 0.6)         | -0.8 (-1.4, -0.2)*      |
| Average SOn (hh:mm)      | 22:57 ± 0:48    | 23:06 ± 0:48    | 23:55 ± 0:53    | 23:18 ± 0:55    | -0.2 (-0.4, -0.1)*         | -0.6 (-0.9, -0.3)**     | 0.8 (0.4, 1.1)***       |
| Average SOff (hh:mm)     | 05:48 ± 0:31    | 05:40 ± 0:29    | 06:13 ± 0:38    | 06:15 ± 0:46    | -0.1 (-0.2, 0.1)           | -0.5 (-0.7, -0.3)***    | -0.2 (-0.4, 0.1)        |
| Average SD (hour)        | 6.8 ± 0.9       | 6.6 ± 0.8       | 6.3 ± 1.0       | 6.9 ± 0.8       | 0.2 (0.0, 0.4)*            | 0.1 (-0.2, 0.4)         | -0.8 (-1.2, -0.4)***    |
| Social jetlag (min)      | 17.6 ± 30.2     | 23.4 ± 23.5     | 54.5 ± 44.4     | 39.6 ± 42.0     | -4.6 (-13.9, 4.8)          | -26.5 (-38.9, -14.0)*** | 20.6 (2.1, 39.1)        |
| Physical activity (MET)  | 1663.7 ± 1710.5 | 3467.9 ± 2386.9 | 1718.6 ± 2172.7 | 3558.1 ± 2520.1 | 1821.8 (1240.4, 2403.3)*** | -72.5 (-839.0, 694.0)   | -35.2 (-1198.1, 1127.7) |

Data were presented in mean and standard deviation. Indicated statistically significant using Two-way Mixed ANOVA test at \*p<0.05, \*\*p<0.01 and \*\*\*p<0.001.

Abbreviations: MT, morning chronotype; ET, evening chronotype; CI, confidence interval; CT, chronotype; EI, energy intake; CHO, carbohydrate; % E, percentage energy; hh:mm, local time in hour and minute; h, hour; min, minutes; Elapse SOn-last meal, elapse time between last mealtime and sleep onset; NES, night eating syndrome; SD, sleep duration

**Table S2 (a):** Distribution of % total energy and energy from macronutrients in early and late windows (n=91)

|                 | M-type (n=46) |             | E-type (n=45) |             | Time   | P value |              |
|-----------------|---------------|-------------|---------------|-------------|--------|---------|--------------|
|                 | Pre           | Post        | Pre           | Post        |        | Group   | Time x Group |
| Early window    |               |             |               |             |        |         |              |
| % E total       | 64.8 ± 9.6    | 67.2 ± 9.5  | 62.7 ± 8.9    | 65.6 ± 12.7 | 0.028  | 0.308   | 0.828        |
| % E CHO         | 31.9 ± 6.5    | 33.5 ± 5.7  | 29.5 ± 6.4    | 33.0 ± 8.8  | 0.002  | 0.217   | 0.286        |
| % E protein     | 10.3 ± 3.2    | 13.3 ± 3.9  | 9.9 ± 1.9     | 12.0 ± 3.8  | <0.001 | 0.084   | 0.307        |
| % E fat         | 22.6 ± 3.9    | 20.4 ± 5.4  | 23.3 ± 5.4    | 20.6 ± 5.1  | <0.001 | 0.589   | 0.698        |
| Breakfast       |               |             |               |             |        |         |              |
| % E total       | 28.3 ± 7.5    | 24.5 ± 7.9  | 27.0 ± 10.5   | 25.2 ± 11.4 | 0.004  | 0.841   | 0.332        |
| % E CHO         | 14.2 ± 4.7    | 12.6 ± 4.8  | 12.6 ± 5.9    | 13.1 ± 6.8  | 0.307  | 0.616   | 0.048        |
| % E protein     | 4.1 ± 1.9     | 4.3 ± 2.0   | 4.1 ± 2.0     | 4.3 ± 2.5   | 0.458  | 1.000   | 0.588        |
| % E fat         | 10.0 ± 4.0    | 7.6 ± 3.8   | 10.3 ± 4.7    | 7.8 ± 3.6   | <0.001 | 0.739   | 0.969        |
| Morning snack   |               |             |               |             |        |         |              |
| %E total        | 3.0 ± 5.0     | 3.7 ± 4.9   | 2.9 ± 4.6     | 2.9 ± 6.9   | 0.593  | 0.635   | 0.641        |
| % E CHO         | 2.0 ± 3.0     | 2.3 ± 2.9   | 1.7 ± 2.5     | 1.8 ± 4.0   | 0.534  | 0.447   | 0.740        |
| % E protein     | 0.3 ± 1.0     | 0.4 ± 0.6   | 0.2 ± 0.5     | 0.2 ± 0.8   | 0.954  | 0.419   | 0.600        |
| % E fat         | 0.7 ± 1.5     | 1.0 ± 1.8   | 1.0 ± 1.7     | 0.9 ± 2.3   | 0.633  | 0.929   | 0.384        |
| Lunch           |               |             |               |             |        |         |              |
| % E total       | 33.5 ± 10.3   | 39.0 ± 10.2 | 32.8 ± 8.7    | 37.5 ± 11.2 | <0.001 | 0.546   | 0.770        |
| % E CHO         | 15.7 ± 5.6    | 18.7 ± 6.2  | 15.3 ± 4.9    | 18.1 ± 6.7  | <0.001 | 0.598   | 0.925        |
| % E protein     | 5.9 ± 2.6     | 8.6 ± 3.2   | 5.5 ± 1.6     | 7.5 ± 2.5   | <0.001 | 0.062   | 0.227        |
| % E fat         | 11.9 ± 4.0    | 11.7 ± 4.3  | 12.0 ± 4.0    | 11.9 ± 5.0  | 0.772  | 0.811   | 0.970        |
| Late window     |               |             |               |             |        |         |              |
| % E total       | 35.2 ± 9.6    | 32.8 ± 9.5  | 37.3 ± 8.9    | 34.4 ± 12.7 | 0.028  | 0.308   | 0.828        |
| % E CHO         | 17.3 ± 5.4    | 16.0 ± 5.9  | 18.2 ± 5.7    | 15.7 ± 5.9  | 0.005  | 0.599   | 0.269        |
| % E protein     | 5.6 ± 2.0     | 6.2 ± 2.5   | 5.6 ± 1.7     | 6.2 ± 2.8   | 0.006  | 0.904   | 0.972        |
| % E fat         | 12.3 ± 4.9    | 10.6 ± 4.4  | 13.5 ± 4.2    | 12.5 ± 6.7  | 0.042  | 0.076   | 0.580        |
| Afternoon snack |               |             |               |             |        |         |              |
| % E total       | 5.6 ± 6.6     | 4.2 ± 5.8   | 5.3 ± 6.8     | 2.7 ± 4.4   | 0.035  | 0.444   | 0.576        |
| % E CHO         | 3.2 ± 4.0     | 2.4 ± 2.6   | 3.4 ± 4.6     | 1.8 ± 2.7   | 0.021  | 0.823   | 0.560        |
| % E protein     | 0.5 ± 0.6     | 0.4 ± 1.2   | 0.5 ± 0.6     | 0.1 ± 0.4   | 0.256  | 0.394   | 0.346        |
| % E fat         | 1.9 ± 2.2     | 1.4 ± 2.7   | 1.4 ± 1.8     | 0.8 ± 1.8   | 0.092  | 0.155   | 0.836        |
| Dinner          |               |             |               |             |        |         |              |
| % E total       | 29.6 ± 9.1    | 28.6 ± 11.0 | 32.0 ± 9.6    | 31.7 ± 13.3 | 0.594  | 0.159   | 0.771        |
| % E CHO         | 14.1 ± 5.1    | 13.6 ± 6.6  | 14.8 ± 5.0    | 13.9 ± 6.1  | 0.279  | 0.608   | 0.698        |
| % E protein     | 5.1 ± 2.0     | 5.8 ± 2.6   | 5.1 ± 1.9     | 6.1 ± 2.8   | 0.002  | 0.735   | 0.610        |
| % E fat         | 10.4 ± 4.5    | 9.2 ± 4.1   | 12.1 ± 4.4    | 11.7 ± 6.7  | 0.248  | 0.015   | 0.550        |

Bold P value indicate significant difference between pre- and post-intervention within each chronotypes by using Two-way Mixed ANOVA test.

**Supplement Table 2(b):** Distribution of % total energy and energy from macronutrients in early and late windows (Complete case, n=85)

|                 | M-type (n=44) |             | E-type (n=41) |             | Time             | P value      |              |
|-----------------|---------------|-------------|---------------|-------------|------------------|--------------|--------------|
|                 | Pre           | Post        | Pre           | Post        |                  | Group        | Time x Group |
| Early window    |               |             |               |             |                  |              |              |
| % E total       | 64.6 ± 9.7    | 67.1 ± 9.7  | 62.8± 9.1     | 66.0 ± 9.4  | <b>0.027</b>     | 0.438        | 0.786        |
| % E CHO         | 31.9 ± 6.6    | 33.7 ± 5.8  | 29.3 ± 6.6    | 33.1 ± 9.2  | <b>0.002</b>     | 0.227        | 0.251        |
| % E protein     | 10.3 ± 3.2    | 13.3 ± 3.9  | 9.9 ± 1.9     | 12.0 ± 3.8  | <b>&lt;0.001</b> | 0.152        | 0.371        |
| % E fat         | 22.5 ± 3.9    | 20.2 ± 5.2  | 23.6 ± 5.2    | 20.6 ± 5.5  | <b>&lt;0.001</b> | 0.386        | 0.627        |
| Breakfast       |               |             |               |             |                  |              |              |
| % E total       | 28.1 ± 7.4    | 24.1 ± 7.6  | 27.8 ± 10.5   | 25.7 ± 11.7 | <b>0.004</b>     | 0.822        | 0.367        |
| % E CHO         | 14.1 ±4.7     | 12.5 ± 4.6  | 12.8 ± 6.0    | 13.4 ± 6.9  | 0.364            | 0.890        | 0.051        |
| % E protein     | 4.0 ± 1.9     | 4.3 ± 1.7   | 4.3 ± 2.0     | 4.3 ± 2.5   | 0.466            | 0.714        | 0.601        |
| % E fat         | 9.9 ± 4.0     | 7.4 ± 3.8   | 10.7 ± 4.7    | 8.0 ± 3.7   | <b>&lt;0.001</b> | 0.296        | 0.871        |
| Morning snack   |               |             |               |             |                  |              |              |
| %E total        | 3.1 ± 5.1     | 3.8 ± 5.0   | 2.9 ± 4.8     | 3.0 ± 7.2   | 0.601            | 0.611        | 0.651        |
| % E CHO         | 2.0 ± 3.0     | 2.4 ± 2.9   | 1.7 ± 2.6     | 1.9 ± 4.2   | 0.539            | 0.474        | 0.751        |
| % E protein     | 0.4 ± 1.0     | 0.4 ± 0.6   | 0.2 ± 0.5     | 0.3 ± 0.8   | 0.944            | 0.335        | 0.600        |
| % E fat         | 0.8 ± 1.5     | 1.1 ± 1.7   | 1.0 ± 1.8     | 0.9 ± 2.4   | 0.648            | 0.966        | 0.391        |
| Lunch           |               |             |               |             |                  |              |              |
| % E total       | 33.4 ± 10.1   | 39.2 ± 10.0 | 32.0 ± 8.4    | 37.3 ± 11.4 | <b>&lt;0.001</b> | 0.348        | 0.848        |
| % E CHO         | 15.7 ± 5.7    | 18.8 ± 6.2  | 14.8 ± 4.7    | 17.9 ± 6.8  | <b>&lt;0.001</b> | 0.340        | 0.998        |
| % E protein     | 5.8 ± 2.5     | 8.6 ± 3.2   | 5.4 ± 1.6     | 7.5 ± 2.6   | <b>&lt;0.001</b> | 0.080        | 0.294        |
| % E fat         | 11.9 ± 3.9    | 11.7 ± 4.2  | 11.9 ± 4.1    | 11.7 ± 5.2  | 0.772            | 0.986        | 0.965        |
| Late window     |               |             |               |             |                  |              |              |
| % E total       | 35.4 ± 9.7    | 32.9 ± 9.7  | 37.2 ± 9.0    | 34.0 ± 13.0 | <b>0.027</b>     | 0.438        | 0.786        |
| % E CHO         | 17.3 ± 5.4    | 16.0 ± 5.8  | 18.5 ± 5.8    | 15.4 ± 5.9  | <b>0.004</b>     | 0.770        | 0.239        |
| % E protein     | 5.4 ± 1.9     | 6.2 ± 2.5   | 5.5 ± 1.7     | 6.3 ± 2.9   | <b>0.006</b>     | 0.752        | 0.918        |
| % E fat         | 12.5 ± 4.9    | 10.8 ± 4.4  | 13.6 ± 4.3    | 12.5 ± 7.0  | <b>0.043</b>     | 0.134        | 0.615        |
| Afternoon snack |               |             |               |             |                  |              |              |
| % E total       | 5.7 ± 6.7     | 4.3 ± 5.8   | 5.6 ± 7.0     | 3.0 ± 4.6   | <b>0.033</b>     | 0.492        | 0.540        |
| % E CHO         | 3.3 ± 4.0     | 2.4 ± 2.6   | 3.6 ± 4.8     | 2.0 ± 2.8   | <b>0.020</b>     | 0.868        | 0.521        |
| % E protein     | 0.5 ± 0.6     | 0.5 ± 1.2   | 0.5 ± 0.6     | 0.3 ± 0.4   | 0.247            | 0.392        | 0.332        |
| % E fat         | 1.9 ± 2.2     | 1.4 ± 2.7   | 1.6 ± 1.9     | 0.9 ± 1.8   | 0.091            | 0.195        | 0.804        |
| Dinner          |               |             |               |             |                  |              |              |
| % E total       | 29.6 ± 9.2    | 28.5 ± 11.1 | 31.6 ± 9.7    | 31.2 ± 13.7 | 0.599            | 0.247        | 0.781        |
| % E CHO         | 14.1 ± 4.9    | 13.6 ± 6.6  | 14.6 ± 4.8    | 13.5 ± 6.0  | 0.275            | 0.801        | 0.678        |
| % E protein     | 4.9 ± 1.9     | 5.7 ± 2.6   | 5.0 ± 1.9     | 6.1 ± 2.8   | <b>0.002</b>     | 0.590        | 0.557        |
| % E fat         | 10.5 ± 4.6    | 9.3 ± 4.4   | 12.0 ±4.4     | 11.6 ± 6.9  | 0.254            | <b>0.037</b> | 0.569        |

Bold P value indicate significant difference between pre- and post-intervention within each chronotypes by using Two-way Mixed ANOVA test.

**Table S3:** Pre-post intervention differences in adiposity, and biochemical parameters (Complete case, n=85).

|                          | MT (n=44)    |              | ET (n=41)    |              | Mean difference (95% CI) |                    |
|--------------------------|--------------|--------------|--------------|--------------|--------------------------|--------------------|
|                          | Pre          | Post         | Pre          | Post         | Time                     | Time x CT          |
| <b>Adiposity</b>         |              |              |              |              |                          |                    |
| Weight (kg)              | 79.7 ± 16.5  | 75.3 ± 15.6  | 80.6 ± 13.5  | 76.7 ± 12.3  | -4.2 (-5.2, -3.2)***     | -0.5 (-2.4, 1.5)   |
| BMI (kg/m <sup>2</sup> ) | 31.3 ± 4.4   | 29.6 ± 4.6   | 30.8 ± 4.0   | 29.3 ± 3.9   | -1.6 (-2.0, -1.3)***     | -0.2 (-0.9, 0.5)   |
| Body fat (%)             | 41.4 ± 7.5   | 39.1 ± 8.6   | 39.3 ± 7.8   | 37.4 ± 8.2   | -2.1 (-2.7, -1.5)***     | -0.3 (-1.5, 0.9)   |
| WC (cm)                  | 94.0 ± 11.8  | 90.2 ± 11.8  | 93.4 ± 9.5   | 88.9 ± 8.6   | -4.2 (-5.2, -3.1)***     | 0.7 (-1.4, 2.8)    |
| <b>Biochemical</b>       |              |              |              |              |                          |                    |
| FBG (mmol/L)             | 5.0 ± 0.5    | 4.9 ± 0.6    | 5.0 ± 0.7    | 5.0 ± 0.8    | -0.1 (-0.2, 0.03)        | -0.01 (-0.2, 0.2)  |
| Insulin (μIU/ml)         | 14.0 ± 7.5   | 10.2 ± 6.9   | 13.0 ± 9.6   | 9.9 ± 5.9    | -3.4 (-4.9, -2.0)***     | -0.7 (-3.5, 2.2)   |
| HbA1c (%)                | 5.8 ± 0.5    | 5.8 ± 0.7    | 5.8 ± 0.6    | 5.8 ± 0.5    | 0.01 (-0.1, 0.1)         | 0.1 (-0.1, 0.2)    |
| HOMA-IR                  | 3.2 ± 1.8    | 2.3 ± 2.0    | 3.0 ± 2.5    | 2.3 ± 1.6    | -0.8 (-1.2, -0.4)***     | -0.1 (-0.8, 0.6)   |
| TC (mmol/L)              | 5.2 ± 1.0    | 5.2 ± 1.1    | 5.2 ± 0.9    | 5.1 ± 0.9    | -0.1 (-0.2, 0.1)         | 0.1 (-0.2, 0.4)    |
| TG (mmol/L)              | 1.3 ± 0.8    | 1.2 ± 0.8    | 1.4 ± 0.8    | 1.3 ± 0.9    | -0.1 (-0.2, -0.01)*      | -0.01 (-0.2, 0.2)  |
| LDL-C (mmol/L)           | 3.3 ± 0.94   | 3.4 ± 1.0    | 3.2 ± 0.9    | 3.2 ± 0.8    | 0.04 (-0.1, 0.2)         | 0.1 (-0.2, 0.3)    |
| HDL-C (mmol/L)           | 1.3 ± 0.3    | 1.3 ± 0.3    | 1.4 ± 0.3    | 1.3 ± 0.2    | -0.05 (-0.1, -0.01)*     | 0.03 (-0.1, 0.1)   |
| Uric acid (mmol/L)       | 0.4 ± 0.1    | 0.3 ± 0.1    | 0.4 ± 0.1    | 0.4 ± 0.1    | -0.01 (-0.03, -0.00)*    | 0.00 (-0.02, 0.02) |
| <b>Blood pressure</b>    |              |              |              |              |                          |                    |
| Systolic (mmHg)          | 129.0 ± 10.3 | 119.0 ± 12.1 | 135.5 ± 12.3 | 127.4 ± 14.5 | -9.1 (-11.4, -6.7)***    | -1.9 (-6.6, 2.8)   |
| Diastolic (mmHg)         | 80.6 ± 9.2   | 75.4 ± 12.3  | 81.4 ± 9.3   | 77.4 ± 9.9   | -4.6 (-7.1, -2.2)***     | -1.3 (-6.2, 3.6)   |

Data were presented in mean and standard deviation. Indicated statistically significant using Two-way Mixed ANOVA test at \*p<0.05, \*\*p<0.01 and \*\*\*p<0.001. Abbreviations: MT, morning chronotype; ET, evening chronotype; CI, confidence interval; CT, chronotype; BMI, body mass index; WC, waist circumference; FBG, fasting blood glucose; HOMA-IR, homeo-static model assessment of insulin resistance; TC, total cholesterol; LDL-C, low-density lipoprotein cholesterol; HDL-C, high-density lipoprotein cholesterol.

**Table S4:** Eating out (food-away from home) frequency in a week (n=91)

|                 | Pre       | Post      | P-value |
|-----------------|-----------|-----------|---------|
| Breakfast       | 4.2 ± 2.7 | 2.3 ± 2.5 | <0.001  |
| Morning snack   | 1.1 ± 2.0 | 0.4 ± 1.3 | 0.005   |
| Lunch           | 4.0 ± 2.4 | 3.8 ± 2.4 | 0.496   |
| Afternoon snack | 1.6 ± 2.2 | 0.5 ± 1.1 | <0.001  |
| Dinner          | 2.3 ± 2.7 | 1.6 ± 2.0 | 0.020   |

Bold P value indicate significant difference between pre- and post-intervention by using paired T-test.
